# Supplementary material for: Protein-specific prediction of mRNA binding using RNA sequences, binding motifs and predicted secondary structures
Source: PubMed Central journal article supplement (PMC4098778; doi:10.1186/1471-2105-15-123), 2014-04-29

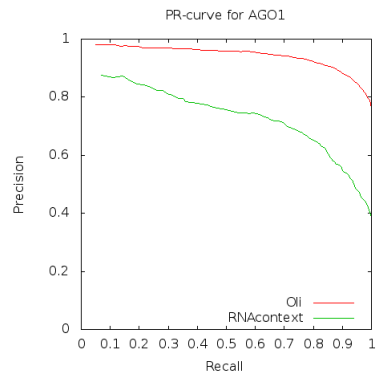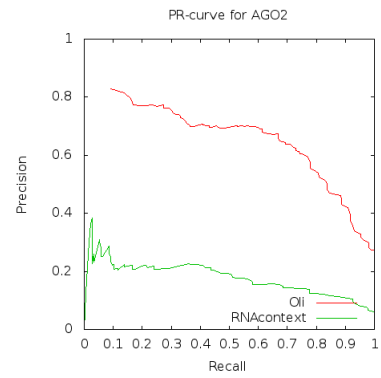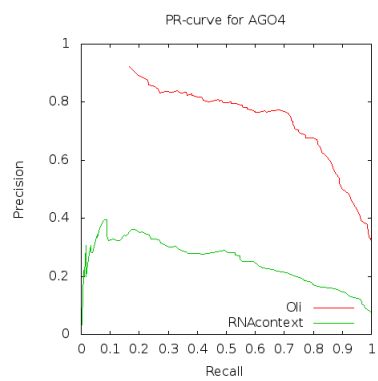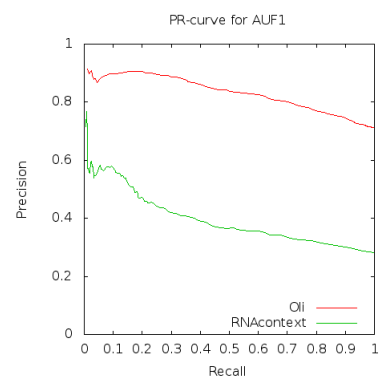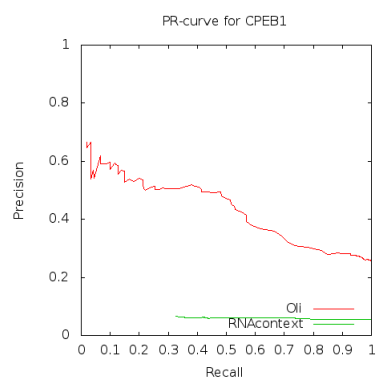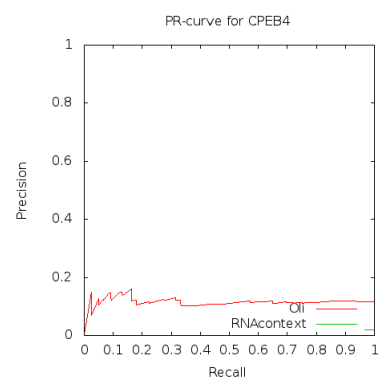

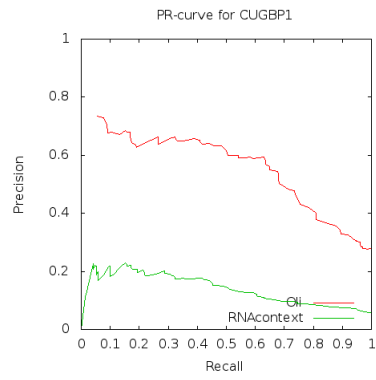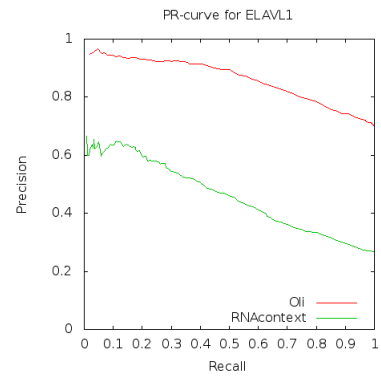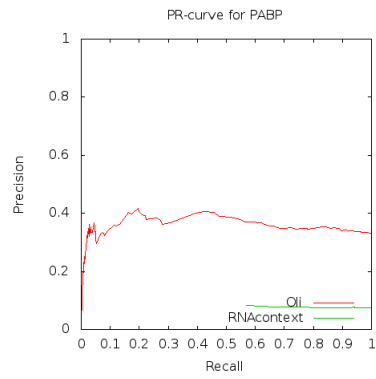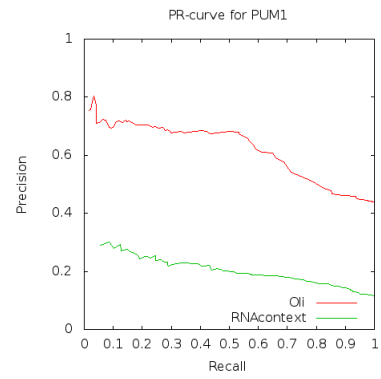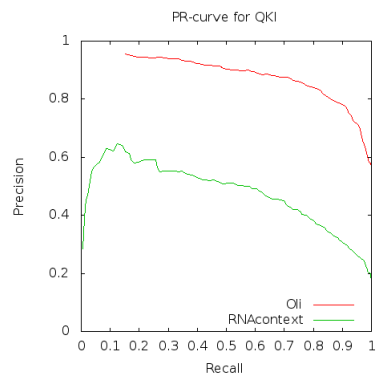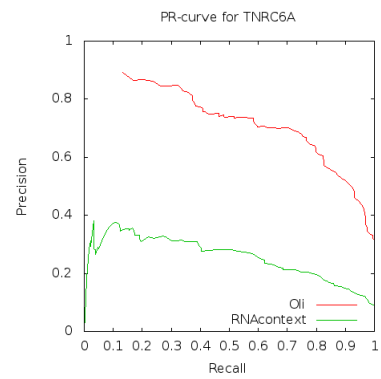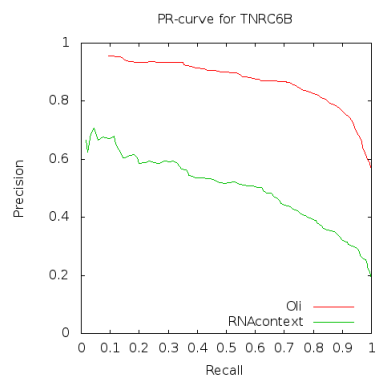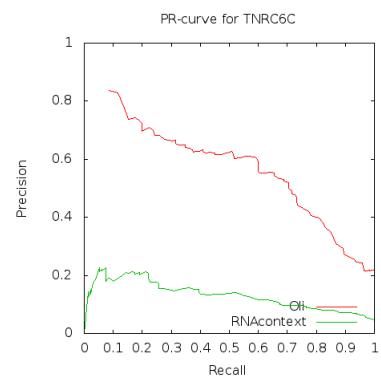

Supplement: 1471-2105-15-123-S4.pdf [file 1471-2105-15-123-S4.pdf]
